# Supplementary material for: Hexaphenylbenzene-based fluorescent aggregates for detection of zinc and pyrophosphate ions in aqueous media: tunable self-assembly behaviour and construction of a logic device
Source: Royal Society of Chemistry journal article supplement (doi:10.1039/c6nj03953g), 2017-01-01
Supplement: c6nj03953g1.pdf [file c6nj03953g1.pdf]

## Electronic Supporting Information

### **Hexaphenylbenzene-Based Fluorescent Aggregates for Detection of Zinc and Pyrophosphate Ions in Aqueous Media: Tunable Self-assembly Behaviour and Construction of Logic Device**

Subhamay Pramanik, Vandana Bhalla,\* and Manoj Kumar\*

Department of Chemistry, UGC Sponsored Centre for Advanced Studies-II

Guru Nanak Dev University, Amritsar 143005, and Punjab, India

[vanmanan@yahoo.co.in](mailto:vanmanan@yahoo.co.in), [mksharmaa@yahoo.co.in](mailto:mksharmaa@yahoo.co.in)

#### **CONTENTS:**

|                 |                                                                                                                                                                                                                                                            |
|-----------------|------------------------------------------------------------------------------------------------------------------------------------------------------------------------------------------------------------------------------------------------------------|
| <b>Table S1</b> | Comparison of probe <b>7</b> with literature reports for detection of $\text{Zn}^{2+}$ ions                                                                                                                                                                |
| <b>Table S2</b> | Comparison of <b>7</b> - $\text{Zn}^{2+}$ ensemble with literature reports for detection of PPI ions                                                                                                                                                       |
| <b>Fig. S1</b>  | Fluorescence spectra of compound <b>7</b> (5 $\mu\text{M}$ ) showing the variation of fluorescence intensity in Ethanol/glycerol mixture (0 to 60% volume fraction of glycerol in ethanol); $\lambda_{\text{ex}} = 350 \text{ nm}$                         |
| <b>Fig. S2</b>  | Fluorescence spectra of compound <b>7</b> with increasing concentration from 1 to 50 $\mu\text{M}$ ; $\lambda_{\text{ex}} = 350 \text{ nm}$                                                                                                                |
| <b>Fig. S3</b>  | Fluorescence spectra of derivative <b>7</b> (5 $\mu\text{M}$ ) showing the variation of fluorescence intensity with increase in temperature from 25 to 75°C in $\text{H}_2\text{O}/\text{EtOH}$ mixture (6:4, v/v); $\lambda_{\text{ex}} = 350 \text{ nm}$ |
| <b>Fig. S4</b>  | Time-resolved fluorescence decay of compound <b>7</b> in EtOH and $\text{H}_2\text{O}/\text{EtOH}$ (6:4, v/v) mixture, Spectra measured at 450 nm. $\lambda_{\text{ex}} = 377 \text{ nm}$                                                                  |
| <b>Table S3</b> | Table showing the fluorescence lifetime of derivative <b>7</b> in EtOH and $\text{H}_2\text{O}/\text{EtOH}$ (6:4, v/v) mixture                                                                                                                             |
| <b>Fig. S5</b>  | Fluorescence spectra of compound <b>7</b> in response to $\text{ZnCl}_2$ in (a) tap water, $\lambda_{\text{ex}} = 350 \text{ nm}$ ; (b) in ground water, $\lambda_{\text{ex}} = 350 \text{ nm}$                                                            |
| <b>Fig. S6</b>  | Detection limit of compound <b>7</b> for $\text{Zn}^{2+}$ ions                                                                                                                                                                                             |

- Fig. S7** Fluorescence spectra showing the quenching in emission intensity of **7-Zn-PPI** system upon further addition of  $\text{Zn}^{2+}$  ions (10 equiv.),  $\lambda_{\text{ex}} = 350$  nm.
- Fig. S8** Bars represent the emission intensity ratio ( $I_{370}/I_{450}$ ) ( $I_{450}$  = Initial fluorescence intensity at 450 nm;  $I_{370}$  = Final fluorescence intensity at 370 nm after addition of anions). (a) Blue bars represent selectivity of **7** upon addition of different anions; (b) Red bars represent competitive selectivity of receptor **7** towards PPI ions (15 equiv.) in presence of other anions (30 equiv.)
- Fig. S9** Detection limit of **7-Zn<sup>2+</sup>** ensembles for PPI ions
- Fig. S10** SEM images show the change in size of: (a) aggregates of derivative **7** in  $\text{H}_2\text{O}/\text{EtOH}$  (6:4, v/v), (b) in presence of  $\text{Zn}^{2+}$  ions in aggregates of **7**, (c) in addition of PPI to **7-Zn<sup>2+</sup>** ensemble
- Fig. S11** DLS studies show the change in size of: (a) aggregates of derivative **7** in  $\text{H}_2\text{O}/\text{EtOH}$  (6:4, v/v), (b) in presence of  $\text{Zn}^{2+}$  ions in aggregates of **7**, (c) in addition of PPI to **7-Zn<sup>2+</sup>** ensemble
- Fig. S12**  $^1\text{H}$  NMR spectrum of compound **3**
- Fig. S13**  $^{13}\text{C}$  NMR spectrum of compound **3**
- Fig. S14** ESI-MS mass spectrum of compound **3**
- Fig. S15**  $^1\text{H}$  NMR spectrum of compound **5**
- Fig. S16**  $^{13}\text{C}$  NMR spectrum of compound **5**
- Fig. S17** ESI-MS mass spectrum of compound **5**
- Fig. S18**  $^1\text{H}$  NMR spectrum of compound **7**
- Fig. S19**  $^{13}\text{C}$  NMR spectrum of compound **7**
- Fig. S20** ESI-MS mass spectrum of compound **7**

**Table S1** Comparison of probe **7** with literature reports for detection of Zn<sup>2+</sup> ions.

| S.N<br>o. | Publication                                                                  | Sensing<br>Media                                      | Fluoremet<br>ric<br>response | Colorime<br>tric<br>response | Zinc<br>induced<br>modulation<br>of Self-<br>assembly | Detection<br>limit     | Practical<br>applications<br>for the<br>constructio<br>n Logic<br>Device | Sensing<br>ability of<br>Zn <sup>2+</sup> ions in<br>ground<br>water<br>(ZnCl <sub>2</sub> ) | Interferen<br>ce with<br>other<br>Metal ions                     |
|-----------|------------------------------------------------------------------------------|-------------------------------------------------------|------------------------------|------------------------------|-------------------------------------------------------|------------------------|--------------------------------------------------------------------------|----------------------------------------------------------------------------------------------|------------------------------------------------------------------|
| 1         | <b>Present<br/>Manuscript</b>                                                | <b>6:4<br/>(H<sub>2</sub>O:Et<br/>OH, v/v)</b>        | <b>Not<br/>Quenched</b>      | <b>Yes</b>                   | <b>Spherical to<br/>micro rods</b>                    | 14.7 nM                | <b>Yes</b>                                                               | <b>Yes</b>                                                                                   | <b>No</b>                                                        |
| 2         | <i>ACS Sens.</i> ,<br>2016, <b>1</b> , 739-<br>747                           | DMF/<br>H <sub>2</sub> O (9:1,<br>v/v)                | Turn-on                      | Yes                          | Rod to<br>irregular<br>shaped                         | 110 nM                 | No                                                                       | No                                                                                           | No                                                               |
| 3         | <i>ACS Sens.</i> ,<br>2016, <b>1</b> , 144-<br>150                           | CH <sub>3</sub> CN                                    | Turn-on                      | No                           | No                                                    | -                      | No                                                                       | No                                                                                           | Yes (Al <sup>3+</sup> )                                          |
| 4         | <i>Dalton Trans.</i> ,<br>2015, <b>44</b> ,<br>18902-18910                   | CH <sub>3</sub> OH/a<br>queous<br>HEPES<br>(9:1, v/v) | Turn-on                      | No                           | No                                                    | 1.03 μM                | No                                                                       | No                                                                                           | Yes (Cu <sup>2+</sup> ,<br>Al <sup>3+</sup> )                    |
| 5         | <i>Dalton Trans.</i> ,<br>2015, <b>44</b> ,<br>7470-7476                     | Tris-HCl<br>buffer                                    | Turn-on                      | No                           | No                                                    | 2.5×10 <sup>-5</sup> M | No                                                                       | No                                                                                           | Yes (Cd <sup>2+</sup> )                                          |
| 6         | <i>New J. Chem.</i> ,<br>2015, <b>39</b> ,<br>4055-4062                      | HEPES/<br>CH <sub>3</sub> OH<br>(3:7)                 | Turn-on                      | No                           | No                                                    | 76 nM                  | No                                                                       | No                                                                                           | Yes (Cd <sup>2+</sup> )                                          |
| 7         | <i>RSC Adv.</i> ,<br>2015, <b>5</b> ,<br>63634-63640                         | Ethanol                                               | Turn-on                      | Yes                          | No                                                    | 1 nM                   | No                                                                       | No                                                                                           | No                                                               |
| 8         | <i>Polyhedron</i> ,<br>2015, <b>94</b> , 75-<br>82                           | 9:1 v/v<br>MeCN/<br>H <sub>2</sub> O                  | Turn-on                      | No                           | No                                                    | 0.13 μM                | No                                                                       | No                                                                                           | Yes (Cd <sup>2+</sup> )                                          |
| 9         | <i>Dalton Trans.</i> ,<br>2014, <b>43</b> ,<br>1684-1690                     | DMF–<br>H <sub>2</sub> O (1 :<br>1)                   | Turn-on                      | No                           | No                                                    | μM                     | No                                                                       | No                                                                                           | Yes (Cd <sup>2+</sup> )                                          |
| 10        | <i>Dalton Trans.</i> ,<br>2014, <b>43</b> ,<br>10013-10022                   | DMF–<br>H <sub>2</sub> O (1 :<br>1)                   | Turn-on                      | No                           | No                                                    | μM                     | No                                                                       | No                                                                                           | Yes (Cd <sup>2+</sup> )                                          |
| 11        | <i>Sens.<br/>Actuators, B</i> ,<br>2014, <b>201</b> ,<br>204-212             | 4:1<br>MeOH–<br>water                                 | Turn-on                      | No                           | No                                                    | 0.69 μM                | No                                                                       | -                                                                                            | Yes (Cu <sup>2+</sup> ,<br>Ni <sup>2+</sup> , Cd <sup>2+</sup> ) |
| 12        | <i>Chem.<br/>Commun.</i> ,<br>2013, <b>49</b> ,<br>11430-11432               | HEPES<br>buffer                                       | Turn-on                      | No                           | No                                                    | 57 nM                  | No                                                                       | No                                                                                           | Yes (Pb <sup>2+</sup> ,<br>Cd <sup>2+</sup> )                    |
| 13        | <i>Inorg. Chem.</i> ,<br>2012, <b>51</b> ,<br>8760-8774                      | CH <sub>3</sub> CN                                    | Turn-on                      | No                           | No                                                    | 2.3 pM                 | No                                                                       | No                                                                                           | Yes (Cd <sup>2+</sup> )                                          |
| 15        | <i>ACS Appl.<br/>Mater.<br/>Interfaces</i> ,<br>2011, <b>3</b> , 279-<br>286 | Tris-HCl<br>buffer                                    | Turn-on                      | No                           | No<br><b>S3</b>                                       | 0.1 μM                 | No                                                                       | -                                                                                            | Yes (Pb <sup>2+</sup> ,<br>Cd <sup>2+</sup> )                    |

**Table S2** Comparison of **7-Zn<sup>2+</sup>** ensemble with literature reports for detection of PPI ions.

| S.No . | Publication                                                 | Sensing Media                         | Fluoremetric response | Colorimetric response | Pyrophosphate (PPI) induced Self-assembly | Detection limit               | Practical applications for the construction Logic Device |
|--------|-------------------------------------------------------------|---------------------------------------|-----------------------|-----------------------|-------------------------------------------|-------------------------------|----------------------------------------------------------|
| 1      | <b>Present Manuscript</b>                                   | <b>6:4 (H<sub>2</sub>O:EtOH, v/v)</b> | <b>On-On</b>          | <b>Yes</b>            | <b>Micro rods</b>                         | 74 nM                         | <b>Yes</b>                                               |
| 2      | <i>Inorg. Chem.</i> , 2016, <b>55</b> , 2212-2219           | In MOPS Buffer                        | Turn-on               | Yes                   | No                                        | 300 nM                        | No                                                       |
| 3      | <i>ACS Omega</i> , 2016, <b>1</b> , 648-655                 | aqueous HEPES buffer                  | Turn-on               | No                    | No                                        | 10 $\mu$ M                    | No                                                       |
| 4      | <i>Sens. Actuators, B</i> , 2016, <b>233</b> , 591-598      | HEPES buffer                          | Turn-on               | Yes                   | No                                        | 0.11 $\mu$ M                  | No                                                       |
| 5      | <i>RSC Adv.</i> , 2015, <b>5</b> , 60096-60100              | 0.5% DMSO water                       | Turn-on               | Yes                   | Yes                                       | 0.6 equiv.                    | No                                                       |
| 6      | <i>J. Mater. Chem. B</i> , 2014, <b>2</b> , 6634-6638       | EtOH                                  | ESIPT Turn-on         | No                    | No                                        | -                             | No                                                       |
| 7      | <i>Dalton Trans.</i> , 2014, <b>43</b> , 14142-14146        | EtOH                                  | Turn-on               | No                    | No                                        | 2.7 nM                        | No                                                       |
| 8      | <i>J. Mater. Chem. B</i> , 2014, <b>2</b> , 3349-3354       | EtOH                                  | ESIPT Turn-on         | No                    | No                                        | 0.2 equiv.                    | No                                                       |
| 9      | <i>Spectrochim. Acta, Part A</i> , 2014, <b>118</b> , 17-23 | Tris-HCl buffer pH                    | Turn-on               | No                    | No                                        | 2.78 $\mu$ M                  | No                                                       |
| 10     | <i>Anal. Chem.</i> , 2012, <b>84</b> , 5117-5123            | aqueous buffer solution               | Turn-off              | No                    | No                                        | 2.78 $\mu$ M                  | No                                                       |
| 11     | <i>Org. Biomol. Chem.</i> , 2012, <b>10</b> , 5606-5612     | aqueous HEPES buffer                  | Turn-on               | Yes                   | No                                        | $(2.9 \pm 0.3) \times 10^8$ M | No                                                       |
| 12     | <i>Org. Lett.</i> , 2011, <b>13</b> , 1362-1365             | aqueous HEPES buffer                  | Turn-on               | No                    | No                                        | 1 $\mu$ M                     | No                                                       |

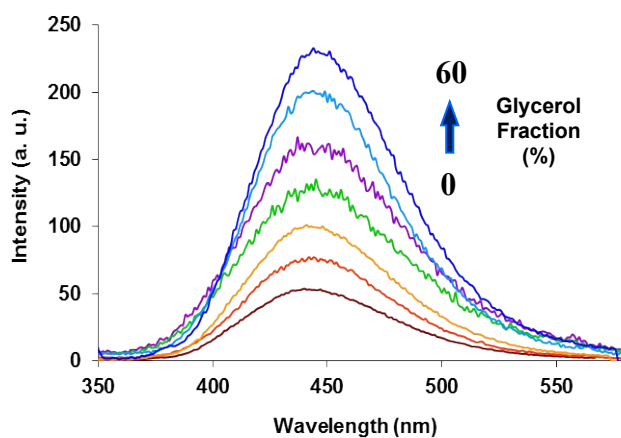

**Fig. S1** Fluorescence spectra of compound **7** (5  $\mu\text{M}$ ) showing the variation of fluorescence intensity in Ethanol/glycerol mixture (0 to 60% volume fraction of glycerol in ethanol);  $\lambda_{\text{ex}} = 350$  nm.

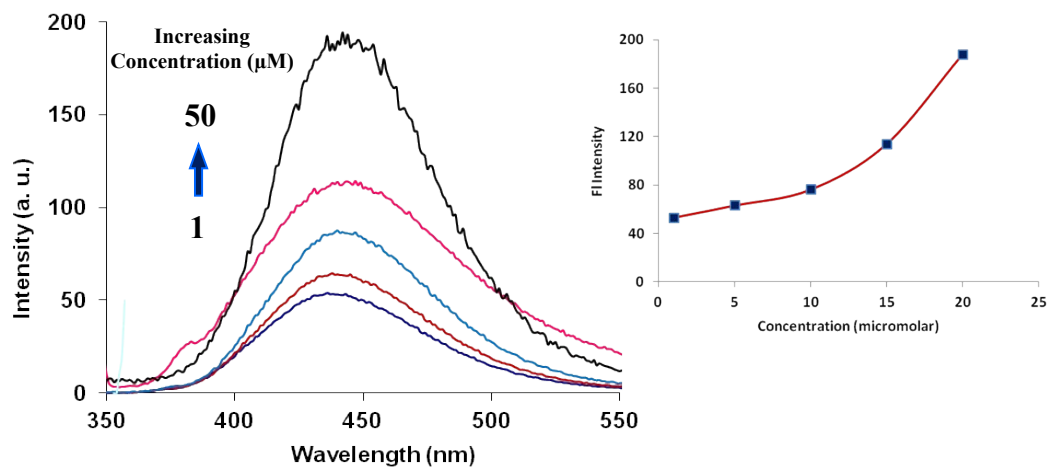

**Fig. S2** Fluorescence spectra of derivative **7** in ethanol with increasing concentration from 1 to 50  $\mu\text{M}$ ;  $\lambda_{\text{ex}} = 350$  nm. Inset showing the non-linear emission enhancement with increasing concentration.

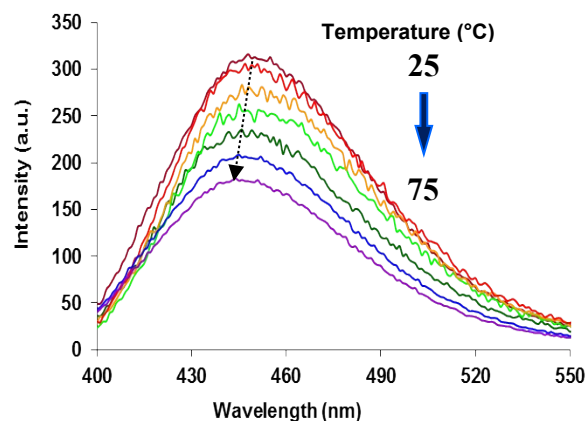

**Fig. S3** Fluorescence spectra of derivative **7** (5  $\mu\text{M}$ ) showing the variation of fluorescence intensity with increase in temperature from 25 to 75  $^{\circ}\text{C}$  in  $\text{H}_2\text{O}/\text{EtOH}$  mixture (6:4, v/v);  $\lambda_{\text{ex}} = 350 \text{ nm}$ .

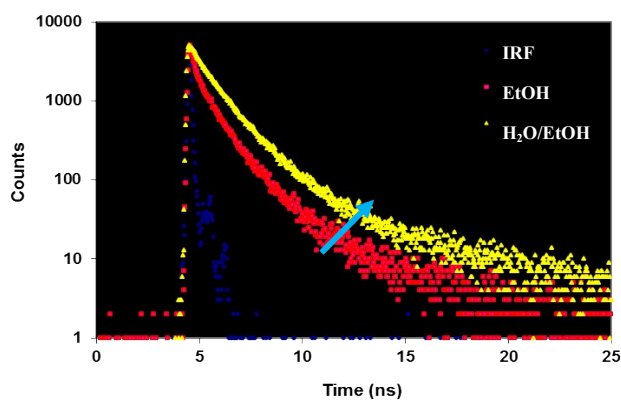

**Fig. S4** Exponential fluorescence decays of derivative **7** in EtOH and  $\text{H}_2\text{O}/\text{EtOH}$  (6:4, v/v) mixture, Spectra measured at 450 nm.  $\lambda_{\text{ex}} = 377 \text{ nm}$ .

**Table S3** Fluorescence lifetime of derivative **7** in EtOH and  $\text{H}_2\text{O}/\text{EtOH}$  (6:4, v/v) mixtures.

| Derivative ( <b>7</b> )                         | $A_1/A_2$   | $\tau_1$<br>(ns) | $\tau_2$<br>(ns) | $\tau_{\text{avg}}$<br>(ns) | $\Phi_f$ | $k_f$<br>( $10^9 \text{ s}^{-1}$ ) | $k_{nr}$<br>( $10^9 \text{ s}^{-1}$ ) |
|-------------------------------------------------|-------------|------------------|------------------|-----------------------------|----------|------------------------------------|---------------------------------------|
| EtOH                                            | 100         | 0.638            | -                | 0.638                       | 0.082    | 0.128                              | 1.438                                 |
| (6:4, v/v),<br>$\text{H}_2\text{O}/\text{EtOH}$ | 74.66/25.34 | 1.193            | 1.048            | 1.122                       | 0.14     | 0.124                              | 0.766                                 |

$A_1$ ,  $A_2$ : fractional amount of molecules in each environment,  $\tau_1$  and  $\tau_2$ : biexponential life time of aggregates in 60 vol% of water in EtOH;  $k_f$ : radiative rate constant ( $k_f = \Phi_f/\tau_{\text{avg}}$ );  $k_{nr}$ : non-radiative rate constant ( $k_{nr} = (1 - \Phi_f)/\tau_{\text{avg}}$ );  $\lambda_{\text{ex}} = 377 \text{ nm}$ .

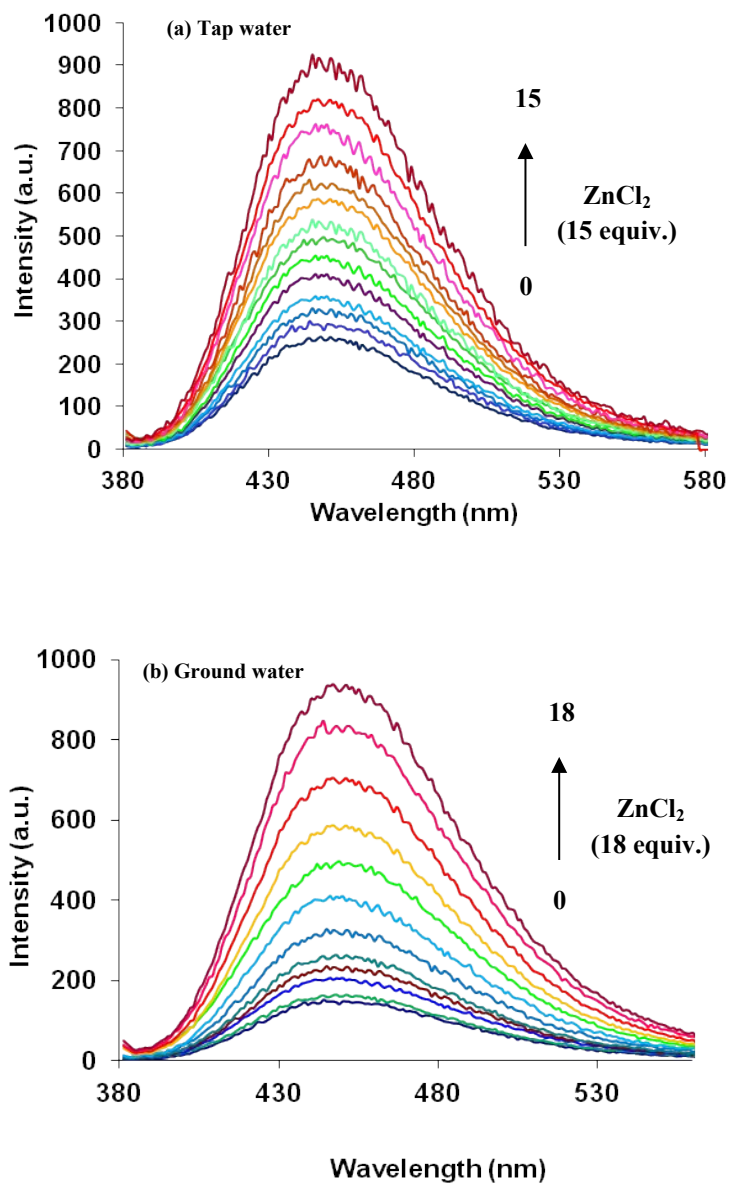

**Fig. S5** Fluorescence spectra of compound **7** in H<sub>2</sub>O/EtOH (6:4, v/v) response to ZnCl<sub>2</sub> in (a) tap water (15 equiv.) and (b) local ground water (18 equiv.),  $\lambda_{\text{ex}}$ = 350 nm.

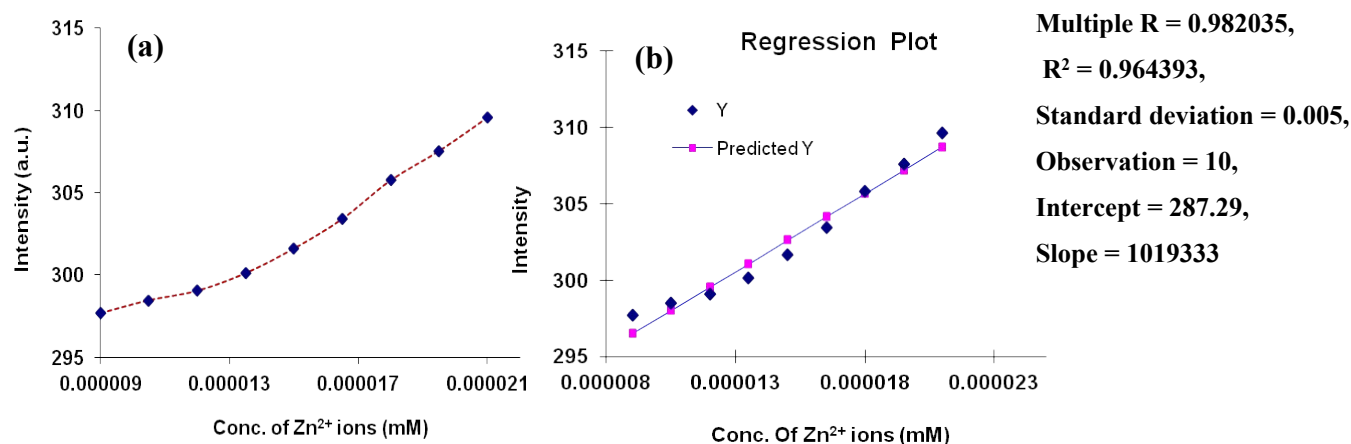

**Fig. S6** (a) Showing the fluorescence intensity of compound **7** and (b) Calibrated curve showing the fluorescence intensity of compound **7** at 450 nm as a function of  $Zn^{2+}$  ions concentration (equiv.) in  $H_2O/EtOH$  (6:4, v/v) buffered with HEPES, pH = 7.05,  $\lambda_{ex}$  = 350 nm.

The detection limit was calculated based on the fluorescence titration. To determine the S/N ratio, the emission intensity of receptor **7** without  $Zn^{2+}$  was measured by 10 times and the standard deviation of blank measurements was determined. The detection limit is then calculated with the following equation:

$$DL = 3 \times SD/S$$

Where SD is the standard deviation of the blank solution measured by 10 times; S is the slope of the calibration curve.

**From the graph we get slope**

S = **1019333**, and SD value is 0.005

Thus using the formula we get the Detection Limit (DL) =  $3 \times 0.005/1019333 = 1.47 \times 10^{-8}M$  = **14.7 nM**.



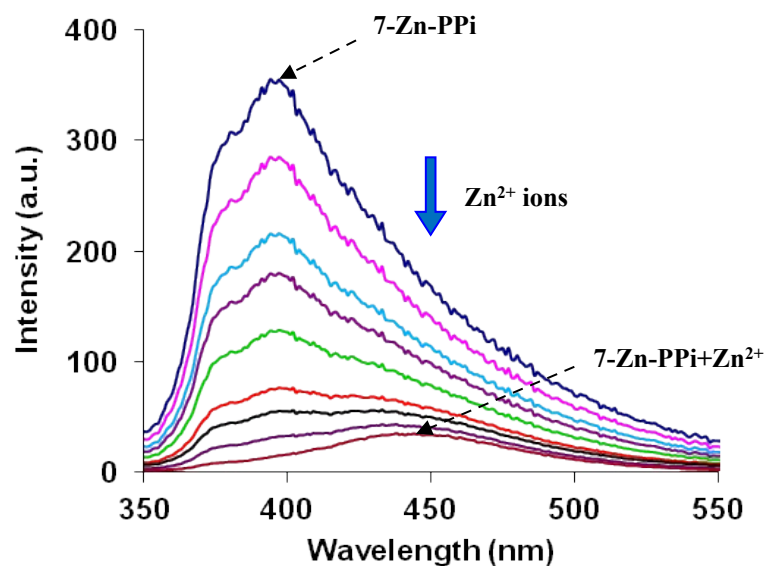

**Fig. S7** Fluorescence spectra showing the quenching in emission intensity of **7-Zn-PPI** system upon further addition of  $\text{Zn}^{2+}$  ions (10 equiv.),  $\lambda_{\text{ex}} = 350 \text{ nm}$ .

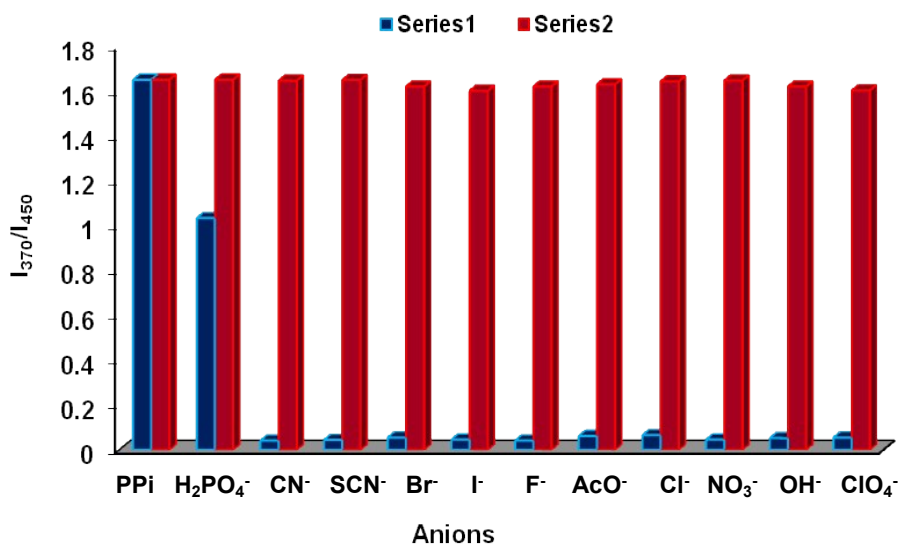

**Fig. S8** Bars represent the emission intensity ratio ( $I_{370}/I_{450}$ ) ( $I_{450}$  = Initial fluorescence intensity at 450 nm;  $I_{370}$  = Final fluorescence intensity at 370 nm after addition of anions). (a) Blue bars represent selectivity of **7** upon addition of different anions; (b) Red bars represent competitive selectivity of receptor **7** towards PPI ions (15 equiv.) in presence of other anions (30 equiv.).

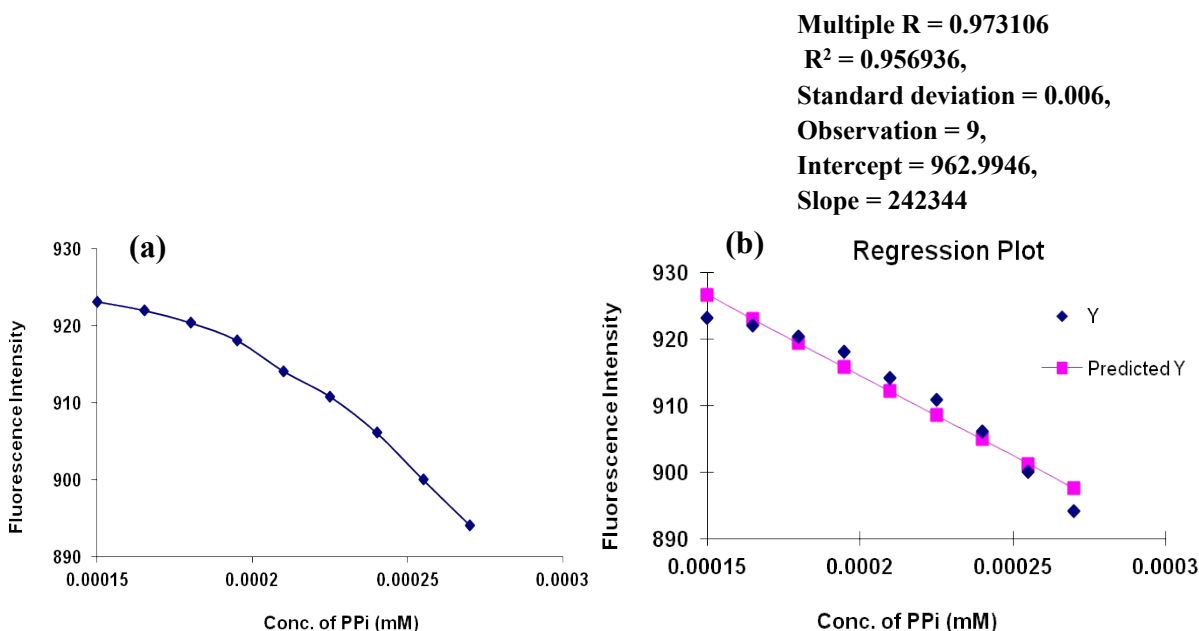

**Fig. S9** (a) Showing the fluorescence intensity of **7-Zn<sup>2+</sup>** ensemble and (b) Calibrated curve showing the fluorescence intensity of **7-Zn<sup>2+</sup>** ensemble at 450 nm as a function of PPI ions concentration (equiv.) in H<sub>2</sub>O/EtOH (6:4, v/v) buffered with HEPES, pH = 7.05,  $\lambda_{\text{ex}}$  = 350 nm.

The detection limit was calculated based on the fluorescence titration. To determine the S/N ratio, the emission intensity of receptor **7** without Zn<sup>2+</sup> was measured by 10 times and the standard deviation of blank measurements was determined. The detection limit is then calculated with the following equation:

$$DL = 3 \times SD/S$$

Where SD is the standard deviation of the blank solution measured by 10 times; S is the slope of the calibration curve.

**From the graph we get slope**

**S = 242344**, and SD value is 0.006

Thus using the formula we get the Detection Limit (**DL**) = **3 × 0.006/242344 = 74 × 10<sup>-9</sup> M = 74 nM.**

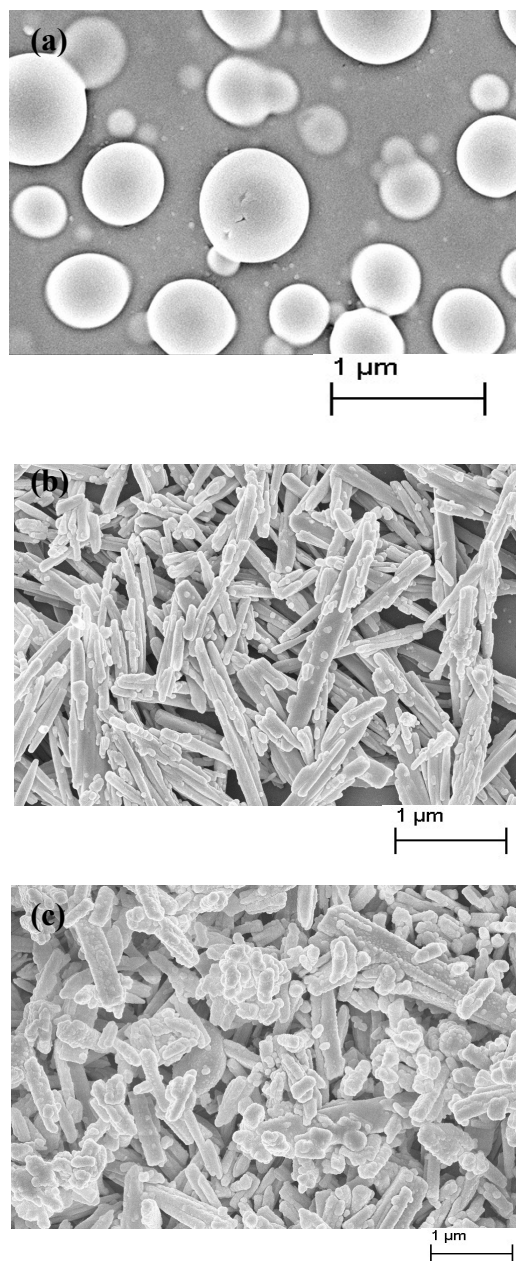

**Fig. S10** SEM images show the change in morphology and size of: (a) aggregates of derivative **7** in H<sub>2</sub>O/EtOH (6:4, v/v), (b) in presence of Zn<sup>2+</sup> ions in aggregates of **7**, (c) in addition of PPI to **7-Zn<sup>2+</sup>** ensemble.

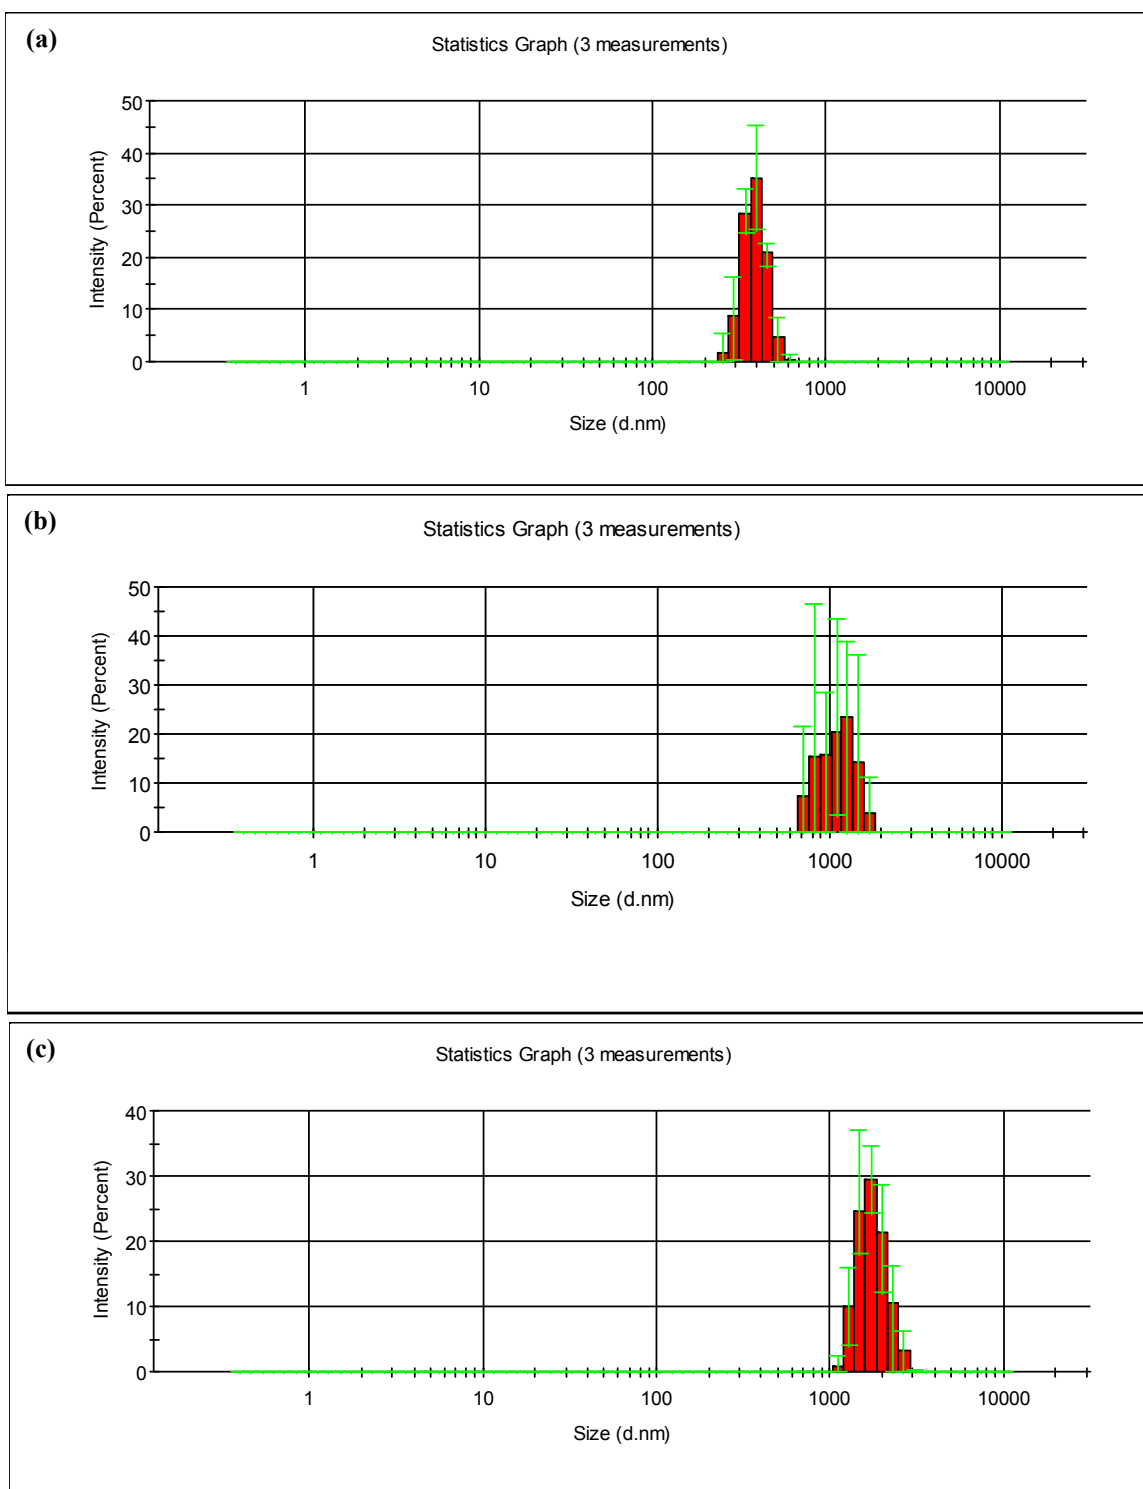

**Fig. S11** DLS studies show the change in size of: (a) aggregates of derivative **7** in H<sub>2</sub>O/EtOH (6:4, v/v), (b) in presence of Zn<sup>2+</sup> ions in aggregates of **7**, (c) in addition of PPI to **7**-Zn<sup>2+</sup> ensemble.

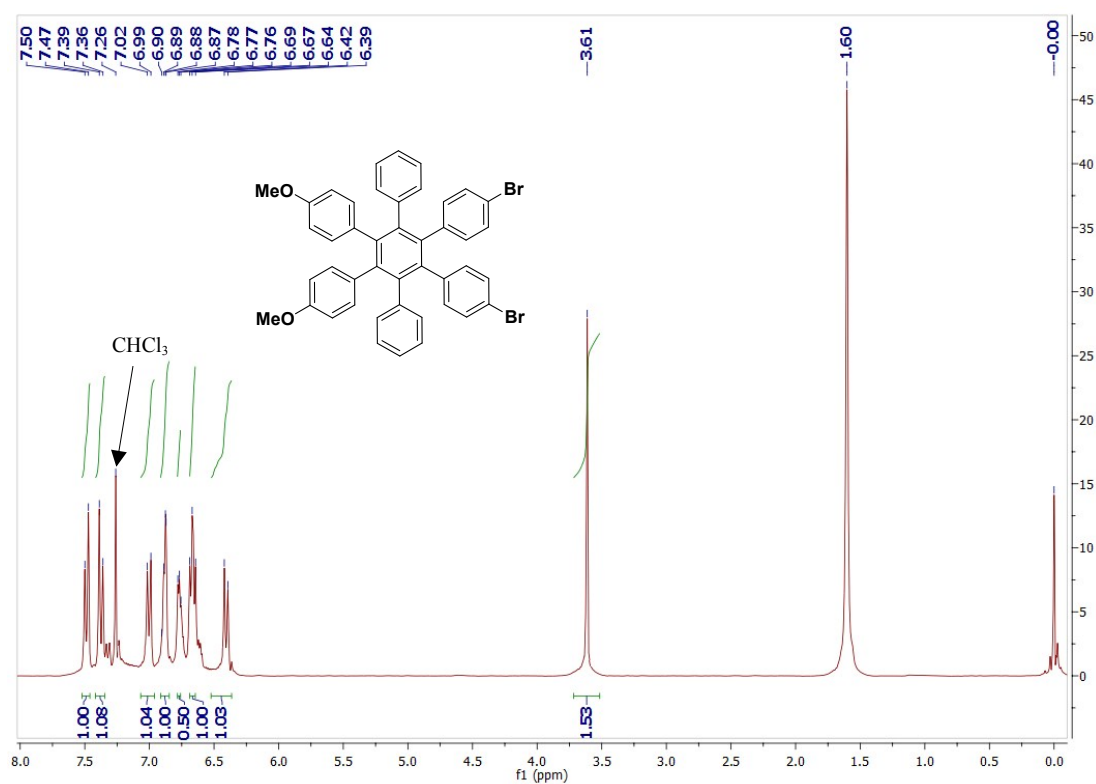

**Fig. S12** <sup>1</sup>H NMR spectrum of compound **3** in CDCl<sub>3</sub>.

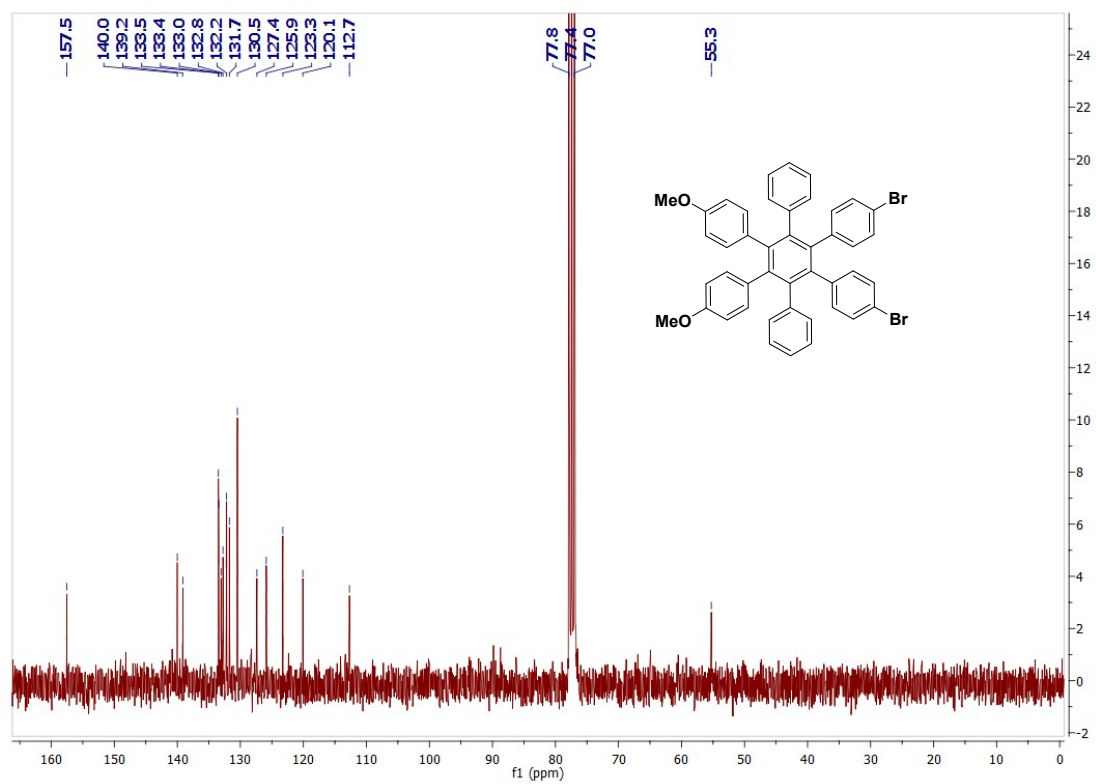

**Fig. S13** <sup>13</sup>C NMR spectrum of compound **3** in CDCl<sub>3</sub>.

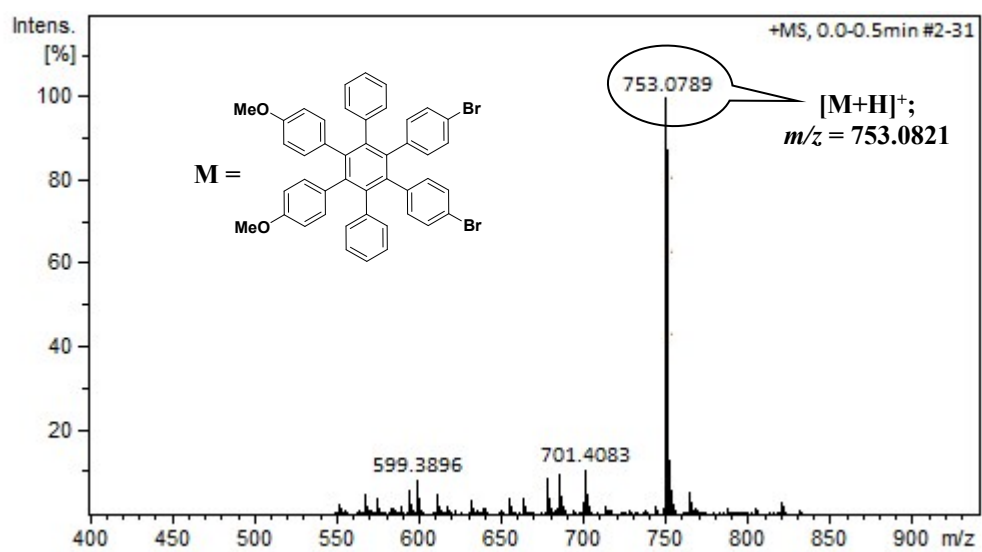

**Fig. S14** ESI-MS mass spectrum of compound **3**.

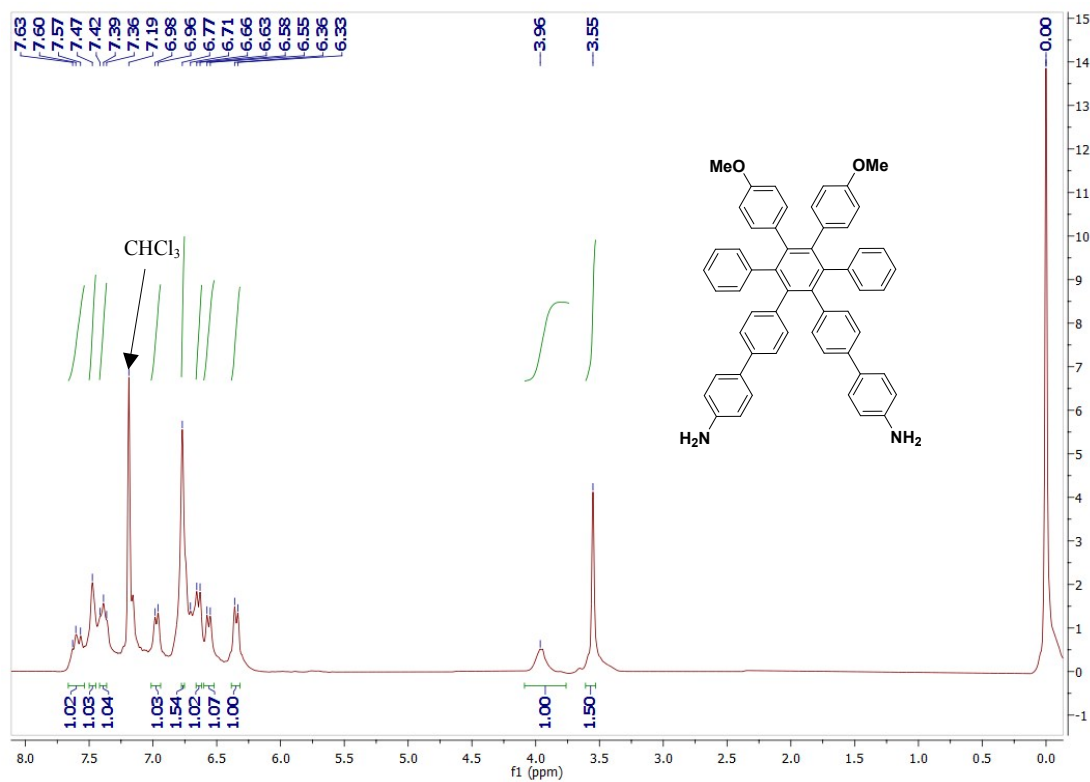

Fig. S15 <sup>1</sup>H NMR spectrum of compound **5** in CDCl<sub>3</sub>.

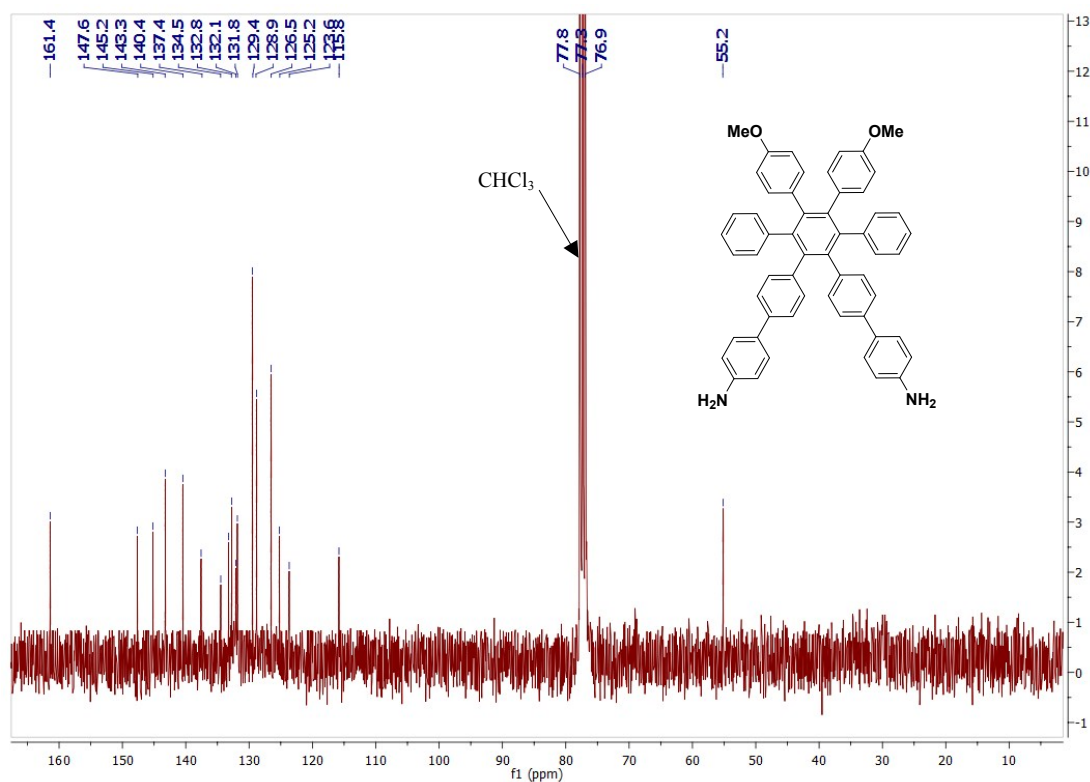

Fig. S16 <sup>13</sup>C NMR spectrum of compound **5** in CDCl<sub>3</sub>.

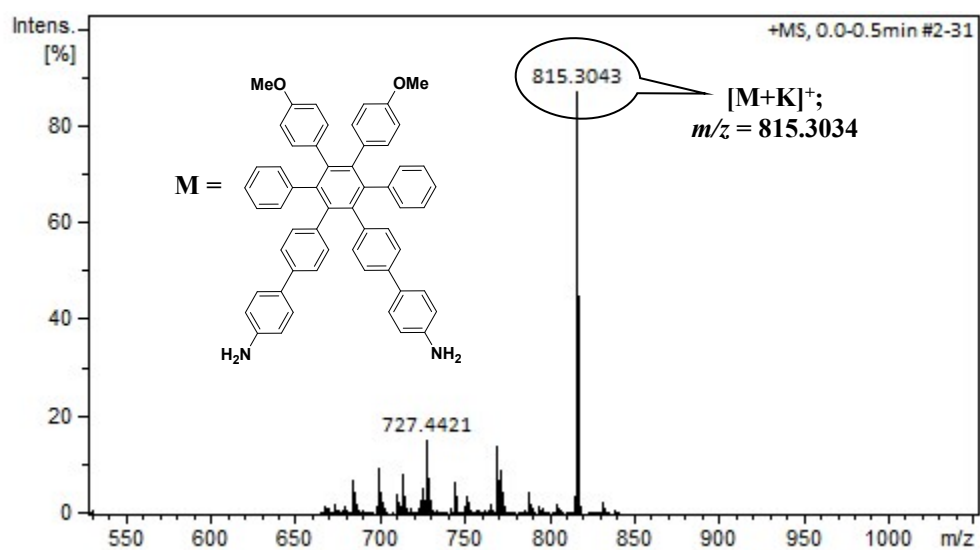

**Fig. S17** ESI-MS mass spectrum of compound **5**.



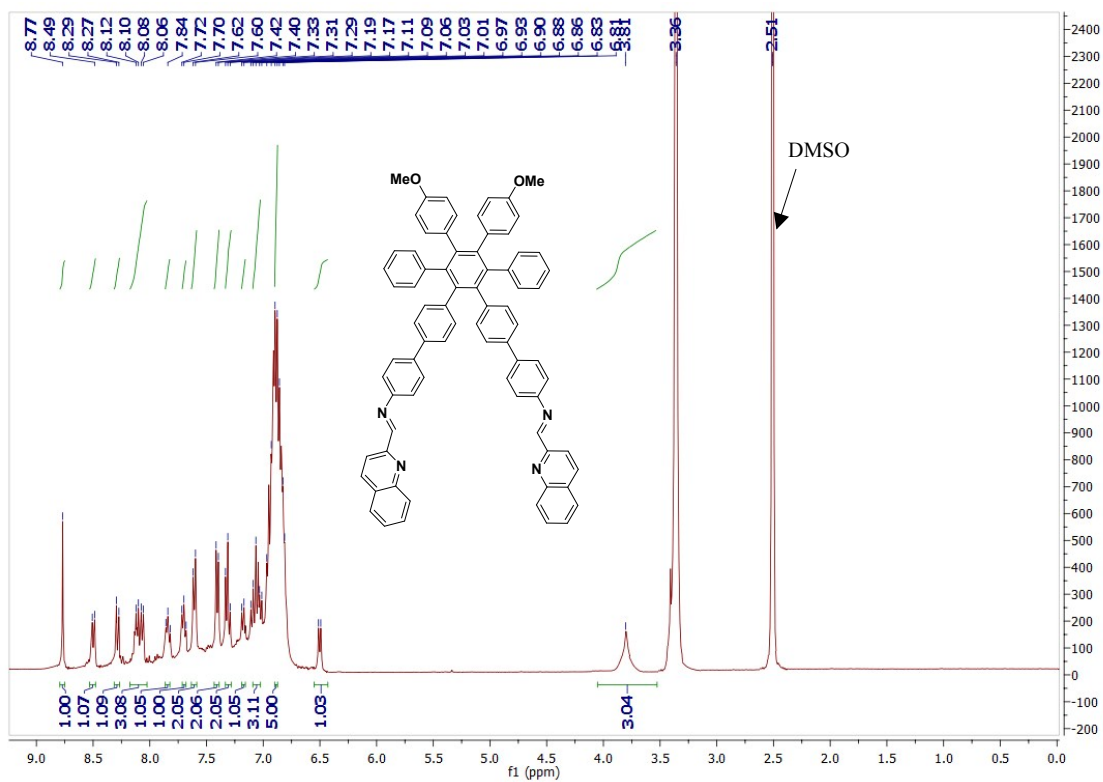

**Fig. S18** <sup>1</sup>H NMR spectrum of compound **7** in DMSO-d<sub>6</sub>.

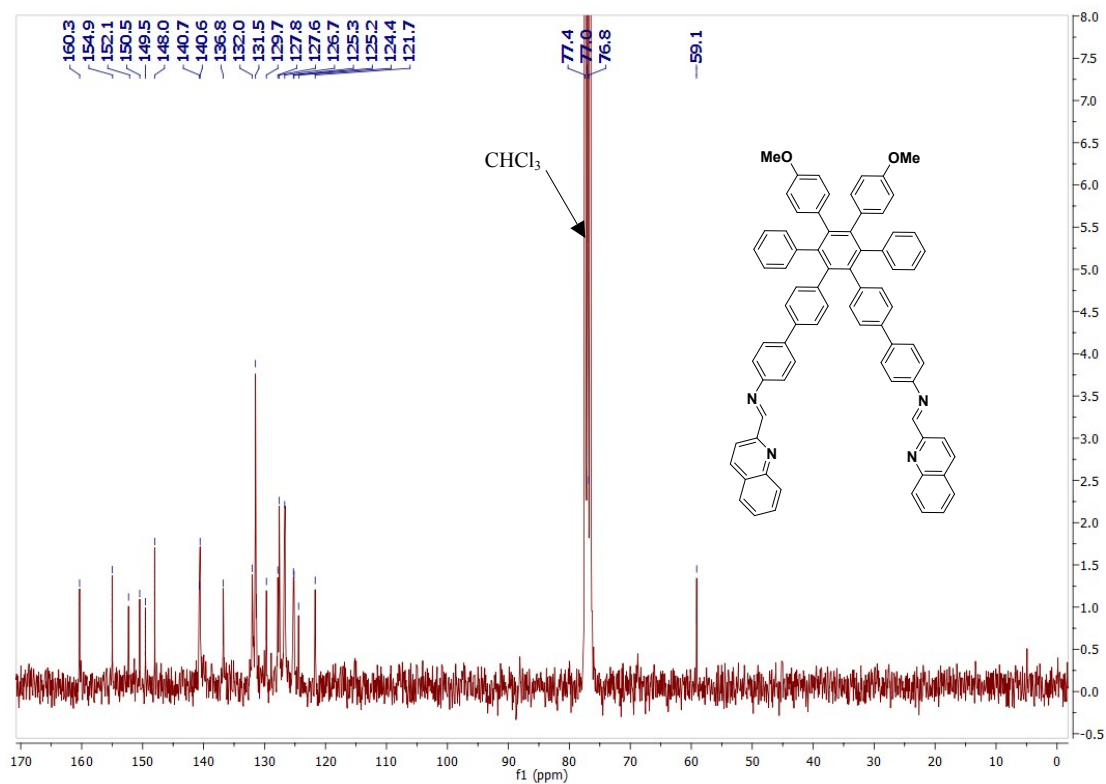

**Fig. S19** <sup>13</sup>C NMR spectrum of compound **7** in CDCl<sub>3</sub>.

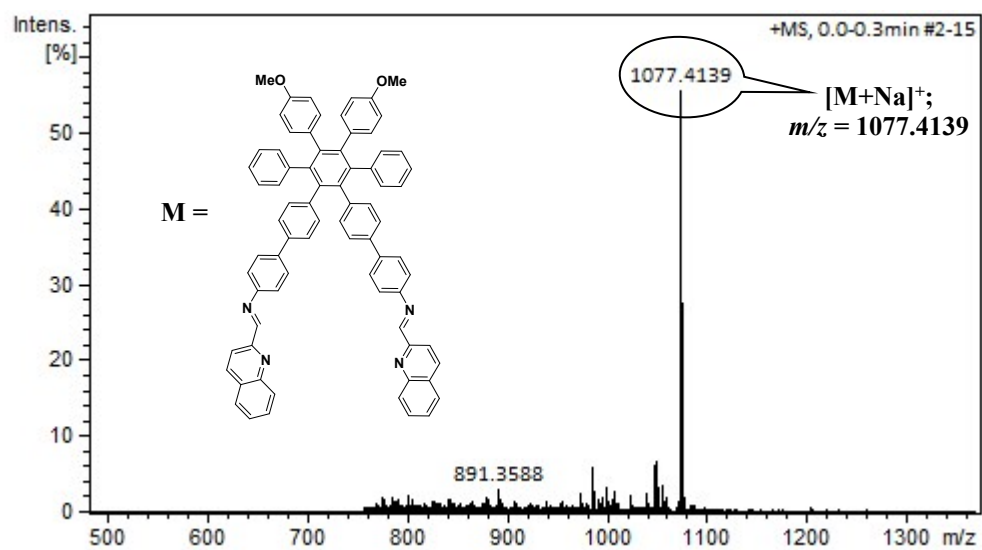

Fig. S20 ESI-MS mass spectrum of compound 7.
